# Supplementary material for: A Novel and Simplified Score for Determining Treatment Eligibility for Patients with Chronic Hepatitis B
Source: MDPI journal article supplement (doi:10.3390/v15030724), 2023-03-10
Supplement: s1 [file s1]

## SUPPLEMENTARY MATERIALS

**Table S1 Summary of international and THASL guideline recommendations for antiviral treatment for chronic HBV infections.**

| Viral replication    |                 | Liver Inflammation |                | Liver Fibrosis               | Decision |
|----------------------|-----------------|--------------------|----------------|------------------------------|----------|
| HBeAg Status         | HBV DNA (IU/ml) | ALT                | Histopathology | Histology or liver stiffness |          |
| Thai Guideline 2015  |                 |                    |                |                              |          |
| Positive or negative | >2,000          | >2X ULN for 3 mo   |                |                              | Treat    |
|                      |                 |                    | ≥A2            |                              |          |
|                      |                 |                    |                | ≥F2                          |          |
|                      | Detectable      |                    |                | F4                           |          |
| EASL 2017            |                 |                    |                |                              |          |
| Positive             | >20,000         | >2X ULN            |                |                              | Treat    |
| Negative             | >2,000          |                    | ≥A2            |                              |          |
|                      |                 |                    |                | ≥F2                          |          |
| Positive or negative | Detectable      |                    |                | F4                           |          |
| AASLD 2016           |                 |                    |                |                              |          |
| Positive             | >20,000         | >2X ULN            |                |                              | Treat    |
|                      |                 |                    |                | ≥F2                          |          |
| Negative             | >2,000          | >2X ULN            |                |                              |          |
|                      |                 |                    |                | ≥F2                          |          |
| Positive or negative | Detectable      |                    |                | Compensated F4               |          |
|                      |                 |                    |                | Decompensated F4             |          |
|                      |                 |                    |                | ≥F2                          |          |
| APASL 2016           |                 |                    |                |                              |          |
| Positive             | >20,000         | >2X ULN for 1 mo   |                |                              | Treat    |
|                      |                 |                    | ≥A2            |                              |          |
|                      |                 |                    |                | ≥F2                          |          |
| Negative             | >2,000          | >2X ULN for 1 mo   |                |                              |          |
|                      |                 |                    | ≥A2            |                              |          |
|                      |                 |                    |                | ≥F2                          |          |
| Positive or negative | >2,000          |                    |                | Compensated F4               |          |
|                      | Detectable      |                    |                | Decompensated F4             |          |

\*\*UNL of ALT: APASL, EASL = 40, AASLD = 35 (male), 25 (female)

AASLD, American Association for the Study of Liver Diseases; ALT, alanine aminotransferase; APASL, Asian-Pacific clinical practice guidelines on the management of hepatitis; EASL, European Association for the Study of the Liver; F, fibrosis; HBeAg, hepatitis B e antigen; TB, total bilirubin; THASL, Thai Association for the Study of the Liver; ULN; upper limit normal.

**Table S2. Performance of HePAA scores and optimal cutoff in derivation cohort (n = 602)**

| Cutoff          | 1    | 2    | 3    | 4    | 5    | 6   |
|-----------------|------|------|------|------|------|-----|
| Sensitivity (%) | 96.7 | 92.1 | 84.9 | 50.0 | 16.4 | 1.3 |
| Specificity (%) | 59.0 | 83.6 | 92.6 | 97.2 | 99.7 | 100 |

**Table S3. Performance of simplified score for chronic hepatitis B treatment eligibility according to AASLD guideline in derivation cohort (n = 602)**

|                                              | <b>TREAT-B<br/>(≥2)</b> | <b>Simplified<br/>WHO criteria</b> | <b>REACH-B<br/>(≥6)</b> | <b>HePAA (≥2)</b>      | <b>HePAA (≥3)</b>     |
|----------------------------------------------|-------------------------|------------------------------------|-------------------------|------------------------|-----------------------|
| <b>AUROC</b>                                 | 0.927<br>(0.904-0.951)  | 0.781<br>(0.750-0.812)             | 0.856<br>(0.821-0.890)  | 0.933<br>(0.907-0.958) |                       |
| <b>p value **</b>                            | 0.545                   | <0.001                             | <0.001                  | N/A                    |                       |
| <b>Sensitivity<br/>(%)</b>                   | 85.9<br>(79.7-90.7)     | 94.7<br>(90.2-97.6)                | 97.6<br>(94.1-99.4)     | 91.6<br>(86.1-95.5)    | 85.5<br>(77.8-89.8)   |
| <b>Specificity<br/>(%)</b>                   | 87.3<br>(83.8-90.3)     | 62.7<br>(58.0-67.3)                | 37.7<br>(33.1-42.5)     | 84.1<br>(79.7-87.9)    | 93.2<br>(89.8-95.6)   |
| <b>Positive<br/>predictive<br/>value (%)</b> | 72.6<br>(65.9-78.7)     | 50.0<br>(44.4-55.6)                | 38.2<br>(33.6-42.9)     | 73.6<br>(63.3-78.3)    | 85.6<br>(79.9-90.0)   |
| <b>Negative<br/>predictive<br/>value (%)</b> | 94.0<br>(91.2-96.1)     | 96.8<br>(94.0-98.5)                | 97.6<br>(94.0-99.3)     | 95.4<br>(92.5-97.2)    | 92.6<br>(89.6-94.7)   |
| <b>Positive<br/>likelihood<br/>ratio</b>     | 6.75<br>(5.23-9.70)     | 2.54<br>(2.24-2.89)                | 1.57<br>(1.45-1.69)     | 5.77<br>(4.46-7.45)    | 12.33<br>(8.19-18.56) |
| <b>Negative<br/>likelihood<br/>ratio</b>     | 0.16<br>(0.11-0.23)     | 0.08<br>(0.04-0.16)                | 0.06<br>(0.02-0.17)     | 0.10<br>(0.06-0.17)    | 0.17<br>(0.11-0.24)   |

AUROC, area under receiver operating characteristic curves; REACH-B, risk estimation for hepatocellular carcinoma in chronic hepatitis B; TREAT-B, treatment eligibility in Africa for the hepatitis B virus; WHO, World Health Organization.

\*\* *p* values were obtained using Stata's "roccomp" command.

**Table S4. Performance of simplified score for chronic hepatitis B treatment eligibility according to AASLD guideline in validation cohort (n = 420)**

|                                              | <b>TREAT-B<br/>(≥2)</b> | <b>Simplified<br/>WHO criteria</b> | <b>REACH-B<br/>(≥6)</b> | <b>HePAA (≥2)</b>      | <b>HePAA (≥3)</b>   |
|----------------------------------------------|-------------------------|------------------------------------|-------------------------|------------------------|---------------------|
| <b>AUROC</b>                                 | 0.877<br>(0.839-0.915)  | 0.705<br>(0.671-0.739)             | 0.831<br>(0.788-0.873)  | 0.885<br>(0.851-0.919) |                     |
| <b>p value**</b>                             | 0.553                   | <0.001                             | <0.001                  | N/A                    |                     |
| <b>Sensitivity<br/>(%)</b>                   | 85.1<br>(76.3-91.6)     | 95.7<br>(89.5-98.8)                | 93.6<br>(86.6-97.6)     | 97.6<br>(92.5-99.7)    | 88.2<br>(79.8-93.9) |
| <b>Specificity<br/>(%)</b>                   | 72.4<br>(67.2-77.2)     | 54.9<br>(49.3-60.4)                | 36.2<br>(31.0-41.7)     | 57.2<br>(51.7-62.7)    | 74.1<br>(69.0-78.8) |
| <b>Positive<br/>predictive<br/>value (%)</b> | 47.1<br>(39.4-54.9)     | 37.3<br>(34.4-40.6)                | 29.7<br>(24.6-35.3)     | 39.5<br>(36.5-42.6)    | 49.3<br>(44.4-54.3) |
| <b>Negative<br/>predictive<br/>value (%)</b> | 94.4<br>(90.8-96.9)     | 97.9<br>(94.6-99.2)                | 95.2<br>(89.8-98.2)     | 98.9<br>(95.9-99.7)    | 95.7<br>(92.6-97.5) |
| <b>Positive<br/>likelihood<br/>ratio</b>     | 3.08<br>(2.54-3.75)     | 2.12<br>(1.87-2.41)                | 1.47<br>(1.33-1.62)     | 2.29<br>(2.01-2.60)    | 3.41<br>(2.80-4.16) |
| <b>Negative<br/>likelihood<br/>ratio</b>     | 0.21<br>(0.13-0.34)     | 0.08<br>(0.03-0.20)                | 0.18<br>(0.08-0.39)     | 0.04<br>(0.01-0.15)    | 0.16<br>(0.09-0.28) |

AUROC, area under receiver operating characteristic curves; REACH-B, risk estimation for hepatocellular carcinoma in chronic hepatitis B; TREAT-B, treatment eligibility in Africa for the hepatitis B virus; WHO, World Health Organization.

\*\* p values were obtained using Stata's "roccomp" command.

**Table S5. Performance of various systems for chronic hepatitis B treatment eligibility according to APASL guideline in derivation cohort (n = 602)**

|                                              | <b>TREAT-B<br/>(≥2)</b> | <b>Simplified<br/>WHO criteria</b> | <b>REACH-B<br/>(≥6)</b> | <b>HePAA (≥2)</b>      | <b>HePAA (≥3)</b>     |
|----------------------------------------------|-------------------------|------------------------------------|-------------------------|------------------------|-----------------------|
| <b>AUROC</b>                                 | 0.928<br>(0.904-0.952)  | 0.776<br>(0.745-0.807)             | 0.859<br>(0.825-0.894)  | 0.933<br>(0.907-0.958) |                       |
| <b>p value**</b>                             | 0.650                   | <0.001                             | <0.001                  | N/A                    |                       |
| <b>Sensitivity<br/>(%)</b>                   | 87.7<br>(81.6-92.3)     | 95.7<br>(91.3-98.2)                | 98.1<br>(94.7-99.6)     | 91.9<br>(86.4-95.8)    | 85.9<br>(79.3-91.1)   |
| <b>Specificity<br/>(%)</b>                   | 86.4<br>(82.9-89.5)     | 62.1<br>(57.3-66.6)                | 37.5<br>(32.9-42.2)     | 83.3<br>(78.8-87.2)    | 92.6<br>(89.2-95.2)   |
| <b>Positive<br/>predictive<br/>value (%)</b> | 70.6<br>(63.8-76.8)     | 48.4<br>(42.8-54.1)                | 36.9<br>(32.3-41.6)     | 71.8<br>(66.5-76.5)    | 84.2<br>(78.3-88.8)   |
| <b>Negative<br/>predictive<br/>value (%)</b> | 94.9<br>(92.3-96.9)     | 97.5<br>(94.9-99.0)                | 98.2<br>(94.8-99.6)     | 95.7<br>(92.9-97.5)    | 93.4<br>(90.5-95.5)   |
| <b>Positive<br/>likelihood<br/>ratio</b>     | 6.46<br>(5.06-8.25)     | 2.52<br>(2.23-2.86)                | 1.57<br>(1.46-1.69)     | 5.50<br>(4.29-7.05)    | 11.56<br>(7.82-17.08) |
| <b>Negative<br/>likelihood<br/>ratio</b>     | 0.14<br>(0.09-0.22)     | 0.07<br>(0.03-0.14)                | 0.05<br>(0.02-0.15)     | 0.10<br>(0.06-0.17)    | 0.15<br>(0.10-0.23)   |

AUROC, area under receiver operating characteristic curves; REACH-B, risk estimation for hepatocellular carcinoma in chronic hepatitis B; TREAT-B, treatment eligibility in Africa for the hepatitis B virus; WHO, World Health Organization.

\*\* p values were obtained using Stata's "roccomp" command.

**Table S6. Performance of various systems for chronic hepatitis B treatment eligibility according to APASL guideline in validation cohort (n = 420)**

|                                              | <b>TREAT-B<br/>(≥2)</b> | <b>Simplified<br/>WHO criteria</b> | <b>REACH-B<br/>(≥6)</b> | <b>HePAA (≥2)</b>      | <b>HePAA (≥3)</b>   |
|----------------------------------------------|-------------------------|------------------------------------|-------------------------|------------------------|---------------------|
| <b>AUROC</b>                                 | 0.877<br>(0.839-0.915)  | 0.705<br>(0.671-0.739)             | 0.831<br>(0.788-0.873)  | 0.885<br>(0.851-0.919) |                     |
| <b>p value**</b>                             | 0.553                   | <0.001                             | <0.001                  | N/A                    |                     |
| <b>Sensitivity<br/>(%)</b>                   | 85.1<br>(76.3-91.6)     | 95.7<br>(89.5-98.8)                | 93.6<br>(86.6-97.6)     | 97.9<br>(92.5-99.7)    | 88.3<br>(79.8-93.9) |
| <b>Specificity<br/>(%)</b>                   | 72.4<br>(67.2-77.2)     | 54.9<br>(49.3-60.4)                | 36.2<br>(31.0-41.7)     | 57.2<br>(51.7-62.7)    | 74.2<br>(69.0-78.8) |
| <b>Positive<br/>predictive<br/>value (%)</b> | 47.1<br>(39.4-54.9)     | 37.3<br>(34.4-40.6)                | 29.7<br>(24.6-35.3)     | 39.5<br>(36.5-42.6)    | 49.3<br>(44.4-54.3) |
| <b>Negative<br/>predictive<br/>value (%)</b> | 94.4<br>(90.8-96.9)     | 97.9<br>(94.6-99.2)                | 95.2<br>(89.8-98.2)     | 98.9<br>(95.9-99.7)    | 95.6<br>(92.6-97.5) |
| <b>Positive<br/>likelihood<br/>ratio</b>     | 3.08<br>(2.54-3.75)     | 2.12<br>(1.87-2.41)                | 1.47<br>(1.33-1.62)     | 2.29<br>(2.01-2.60)    | 3.41<br>(2.80-4.16) |
| <b>Negative<br/>likelihood<br/>ratio</b>     | 0.21<br>(0.13-0.34)     | 0.08<br>(0.03-0.20)                | 0.18<br>(0.08-0.39)     | 0.04<br>(0.01-0.15)    | 0.16<br>(0.09-0.28) |

AUROC, area under receiver operating characteristic curves; REACH-B, risk estimation for hepatocellular carcinoma in chronic hepatitis B; TREAT-B, treatment eligibility in Africa for the hepatitis B virus; WHO, World Health Organization.

\*\* p values were obtained using Stata's "roccomp" command.

**Table S7. Performance of various systems for chronic hepatitis B treatment eligibility according to THASL guideline in derivation cohort (n = 602)**

|                                              | <b>TREAT-B<br/>(≥2)</b> | <b>Simplified<br/>WHO criteria</b> | <b>REACH-B<br/>(≥6)</b> | <b>HePAA (≥2)</b>      | <b>HePAA (≥3)</b>     |
|----------------------------------------------|-------------------------|------------------------------------|-------------------------|------------------------|-----------------------|
| <b>AUROC</b>                                 | 0.928<br>(0.904-0.951)  | 0.783<br>(0.753-0.814)             | 0.858<br>(0.824-0.892)  | 0.936<br>(0.911-0.960) |                       |
| <b>p value**</b>                             | 0.4099                  | <0.001                             | <0.001                  | N/A                    |                       |
| <b>Sensitivity<br/>(%)</b>                   | 86.5<br>(80.5-91.3)     | 95.3<br>(91.0-98.0)                | 98.2<br>(95.0-99.6)     | 91.7<br>(86.3-95.5)    | 84.7<br>(78.1-90.0)   |
| <b>Specificity<br/>(%)</b>                   | 87.2<br>(83.7-90.2)     | 63.1<br>(58.4-67.7)                | 38.1<br>(33.4-42.8)     | 84.6<br>(80.2-88.4)    | 93.7<br>(90.5-96.1)   |
| <b>Positive<br/>predictive<br/>value (%)</b> | 72.9<br>(66.2-78.9)     | 50.6<br>(45.0-56.2)                | 38.6<br>(34.0-43.4)     | 74.6<br>(69.4-79.3)    | 86.9<br>(81.2-91.1)   |
| <b>Negative<br/>predictive<br/>value (%)</b> | 94.2<br>(91.5-96.3)     | 97.1<br>(94.4-98.8)                | 98.2<br>(94.8-99.6)     | 95.4<br>(92.5-97.2)    | 92.6<br>(89.6-94.7)   |
| <b>Positive<br/>likelihood<br/>ratio</b>     | 6.78<br>(5.26-8.74)     | 2.58<br>(2.27-2.94)                | 1.59<br>(1.47-1.71)     | 5.97<br>(4.60-7.76)    | 13.51<br>(8.79-20.76) |
| <b>Negative<br/>likelihood<br/>ratio</b>     | 0.15<br>(0.11-0.23)     | 0.07<br>(0.04-0.15)                | 0.05<br>(0.01-0.14)     | 0.10<br>(0.06-0.16)    | 0.16<br>(0.11-0.24)   |

AUROC, area under receiver operating characteristic curves; REACH-B, risk estimation for hepatocellular carcinoma in chronic hepatitis B; TREAT-B, treatment eligibility in Africa for the hepatitis B virus; WHO, World Health Organization.

\*\* p values were obtained using Stata's "roccomp" command.



**Table S8. Performance of various systems for chronic hepatitis B treatment eligibility according to THASL guideline in validation cohort (n = 420)**

|                                              | <b>TREAT-B<br/>(≥2)</b> | <b>Simplified<br/>WHO criteria</b> | <b>REACH-B<br/>(≥6)</b> | <b>HePAA (≥2)</b>      | <b>HePAA (≥3)</b>   |
|----------------------------------------------|-------------------------|------------------------------------|-------------------------|------------------------|---------------------|
| <b>AUROC</b>                                 | 0.877<br>(0.839-0.915)  | 0.705<br>(0.671-0.739)             | 0.831<br>(0.788-0.873)  | 0.885<br>(0.851-0.919) |                     |
| <b>p value**</b>                             | 0.553                   | <0.001                             | <0.001                  | N/A                    |                     |
| <b>Sensitivity<br/>(%)</b>                   | 85.1<br>(76.3-91.6)     | 95.7<br>(89.5-98.8)                | 93.6<br>(86.6-97.6)     | 97.9<br>(92.5-99.7)    | 88.3<br>(79.8-93.9) |
| <b>Specificity<br/>(%)</b>                   | 72.4<br>(67.2-77.2)     | 54.9<br>(49.3-60.4)                | 36.2<br>(31.0-41.7)     | 57.2<br>(51.7-62.7)    | 74.2<br>(69.0-78.8) |
| <b>Positive<br/>predictive<br/>value (%)</b> | 47.1<br>(39.4-54.9)     | 37.3<br>(34.4-40.6)                | 29.7<br>(24.6-35.3)     | 39.5<br>(36.5-42.6)    | 49.3<br>(44.4-54.3) |
| <b>Negative<br/>predictive<br/>value (%)</b> | 94.4<br>(90.8-96.9)     | 97.9<br>(94.6-99.2)                | 95.2<br>(89.8-98.2)     | 98.9<br>(95.9-99.7)    | 95.6<br>(92.6-97.5) |
| <b>Positive<br/>likelihood<br/>ratio</b>     | 3.08<br>(2.54-3.75)     | 2.12<br>(1.87-2.41)                | 1.47<br>(1.33-1.62)     | 2.29<br>(2.01-2.60)    | 3.41<br>(2.80-4.16) |
| <b>Negative<br/>likelihood<br/>ratio</b>     | 0.21<br>(0.13-0.34)     | 0.08<br>(0.03-0.20)                | 0.18<br>(0.08-0.39)     | 0.04<br>(0.01-0.15)    | 0.16<br>(0.09-0.28) |

AUROC, area under receiver operating characteristic curves; REACH-B, risk estimation for hepatocellular carcinoma in chronic hepatitis B; TREAT-B, treatment eligibility in Africa for the hepatitis B virus; WHO, World Health Organization.

\*\* *p* values were obtained using Stata's "roccomp" command.

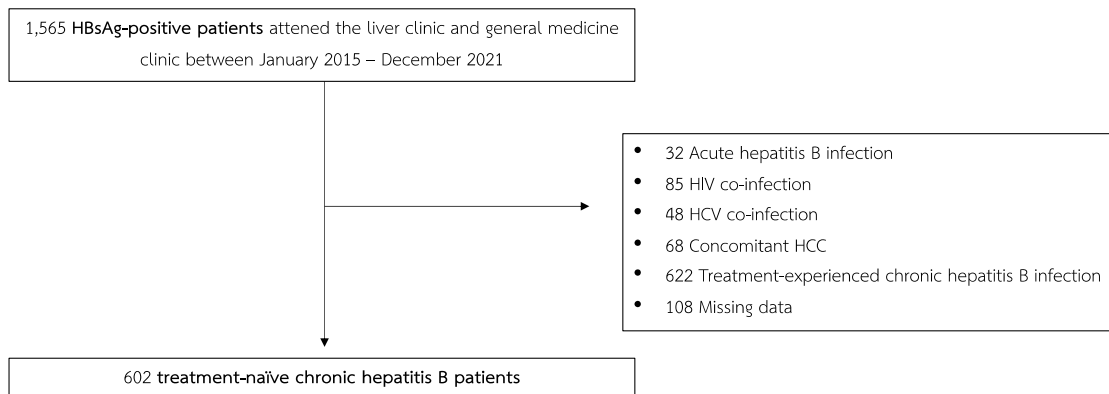

**Figure S1.** Study flow chart

HBV, hepatitis B virus; HCC, hepatocellular carcinoma; HCV, hepatitis C virus; HIV, human immunodeficiency virus; HBsAg, hepatitis B s antigen.
